# Supplementary material
Source: PubMed Central journal article supplement (PMC6823617)
Supplement: ry190452suppa1.pdf [file ry190452suppa1.pdf]

## Appendix E1

### MRI Methods

#### Parametric Mapping Sequences

Acquisition parameters used for parametric mapping are included in Table E3. For brain imaging, pixel-wise maps were generated in MATLAB (R2018a, Mathworks, Natwick, MA) using a 3-parameter monoexponential fit (T1 mapping) or 2-parameter monoexponential fit (T2 and T2\* mapping). Regions-of-interest were manually drawn to calculate parametric values in each tissue. Fast inline parametric mapping sequences were used for cardiac and abdominal mapping (32–34), regions-of-interest were drawn on the inline pixel-wise maps using a Leonardo workstation (Siemens Healthcare, Erlangen, Germany).

#### Contrast Agents

Phantom T1 values were measured using an inversion recovery gradient echo sequence with multiple TIs (10–8000 ms) with TR = 15s. T1 was calculated using a 3-parameter monoexponential fit to the inversion recovery signal. Phantom T2 values were calculated using a spin echo sequence with TE = 10–1000 msec and TR = 15s. T2 was calculated using a 2-parameter fit to the monoexponential signal decay curve.

#### 1.5T Literature Values for Parametric Mapping

The following references were used to generate range of literature values for T1, T2 and T2\* at 1.5T for Table 1:

1. Vymazal J, Righini A, Brooks RA, et al. T1 and T2 in the brain of healthy subjects, patients with Parkinson disease, and patients with multiple system atrophy: relation to iron content. *Radiology* 1999;211(2):489–495.
2. Stanisz GJ, Odrobina EE, Pun J, et al. T1, T2 relaxation and magnetization transfer in tissue at 3T. *Magn Reson Med* 2005;54(3):507–512.
3. Siemonsen S, Finsterbusch J, Matschke J, Lorenzen A, Ding XQ, Fiehler J. Age-dependent normal values of T2\* and T2' in brain parenchyma. *AJNR Am J Neuroradiol* 2008;29(5):950–955.
4. Kritsaneepaiboon S, Ina N, Chotsampancharoen T, Roymanee S, Cheewatanakornkul S. The relationship between myocardial and hepatic T2 and T2\* at 1.5T and 3T MRI in normal and iron-overloaded patients. *Acta Radiol* 2018;59(3):355–362.
5. Grassedonio E, Meloni A, Positano V, et al. Quantitative T2\* magnetic resonance imaging for renal iron overload assessment: normal values by age and sex. *Abdom Imaging* 2015;40(6):1700–1704.
6. Dabir D, Child N, Kalra A, et al. Reference values for healthy human myocardium using a T1 mapping methodology: results from the International T1 Multicenter cardiovascular magnetic resonance study. *J Cardiovasc Magn Reson* 2014;16(1):69.

7. Baeßler B, Schaarschmidt F, Stehning C, Schnackenburg B, Maintz D, Bunck AC. A systematic evaluation of three different cardiac T2-mapping sequences at 1.5 and 3T in healthy volunteers. *Eur J Radiol* 2015;84(11):2161–2170.
8. Bottomley PA, Foster TH, Argersinger RE, Pfeifer LM. A review of normal tissue hydrogen NMR relaxation times and relaxation mechanisms from 1-100 MHz: dependence on tissue type, NMR frequency, temperature, species, excision, and age. *Med Phys* 1984;11(4):425–448.
9. Gold GE, Han E, Stainsby J, Wright G, Brittain J, Beaulieu C. Musculoskeletal MRI at 3.0 T: relaxation times and image contrast. *AJR Am J Roentgenol* 2004;183(2):343–351.
10. Deoni SC, Rutt BK, Peters TM. Rapid combined T1 and T2 mapping using gradient recalled acquisition in the steady state. *Magn Reson Med* 2003;49(3):515–526.
11. de Bazelaire CM, Duhamel GD, Rofsky NM, Alsop DC. MR imaging relaxation times of abdominal and pelvic tissues measured in vivo at 3.0 T: preliminary results. *Radiology* 2004;230(3):652–659.
12. Schwenzler NF, Machann J, Haap MM, et al. T2\* relaxometry in liver, pancreas, and spleen in a healthy cohort of one hundred twenty-nine subjects-correlation with age, gender, and serum ferritin. *Invest Radiol* 2008;43(12):854–860.
13. Deoni SC, Peters TM, Rutt BK. High-resolution T1 and T2 mapping of the brain in a clinically acceptable time with DESPOT1 and DESPOT2. *Magn Reson Med* 2005;53(1):237–241.
14. Westwood M, Anderson LJ, Firmin DN, et al. A single breath-hold multiecho T2\* cardiovascular magnetic resonance technique for diagnosis of myocardial iron overload. *J Magn Reson Imaging* 2003;18(1):33–39.
15. Rakow-Penner R, Daniel B, Yu H, Sawyer-Glover A, Glover GH. Relaxation times of breast tissue at 1.5T and 3T measured using IDEAL. *J Magn Reson Imaging* 2006;23(1):87–91.
16. Giri S, Chung YC, Merchant A, et al. T2 quantification for improved detection of myocardial edema. *J Cardiovasc Magn Reson* 2009;11(1):56.
17. Barth M, Moser E. Proton NMR relaxation times of human blood samples at 1.5 T and implications for functional MRI. *Cell Mol Biol* 1997;43(5):783–791.
18. Stadler A, Jakob PM, Griswold M, Barth M, Bankier AA. T1 mapping of the entire lung parenchyma: Influence of the respiratory phase in healthy individuals. *J Magn Reson Imaging* 2005;21(6):759–764.
19. Wild JM, Marshall H, Bock M, et al. MRI of the lung (1/3): methods. *Insights Imaging* 2012;3(4):345–353.
20. Hatabu H, Alsop DC, Listerud J, Bonnet M, Geftter WB. T2\* and proton density measurement of normal human lung parenchyma using submillisecond echo time gradient echo magnetic resonance imaging. *Eur J Radiol* 1999;29(3):245–252.
21. Ulla M, Bonny JM, Ouchchane L, Rieu I, Claise B, Durif F. Is R2\* a new MRI biomarker for the progression of Parkinson's disease? A longitudinal follow-up. *PLoS One* 2013;8(3):e57904.

22. Hedgire SS, McDermott S, Wojtkiewicz GR, Abtahi SM, Harisinghani M, Gaglia JL. Evaluation of renal quantitative T2\* changes on MRI following administration of ferumoxytol as a T2\* contrast agent. *Int J Nanomedicine* 2014;9:2101–2107.

**Table E1: Contrast agents used for relaxivity calculations**

|                           |                                                                   |                                    |
|---------------------------|-------------------------------------------------------------------|------------------------------------|
| Gadobutrol                | <i>Gadovist</i> , Bayer Healthcare, Berlin Germany                | 0–10mM                             |
| Gadoterare meglumine      | <i>Dotarem</i> , Guerbet, Villepinte, France                      | 0–10mM                             |
| Gadopentetate dimeglumine | <i>Magnevist</i> , Bayer Healthcare, Berlin Germany               | 0–10mM                             |
| Gadofosveset              | <i>Ablavar</i> , Lantheus Medical Imaging, North Billerica, MA    | 0–1mM                              |
| Gadofosveset +            | <i>Ablavar</i> , Lantheus Medical Imaging, North Billerica, MA    | 0–1mM                              |
| Human Serum Albumin       | + HAS Fraction V, Millipore Sigma, Burlington MA (Catalog #12668) | 0.2mM                              |
| Ferumoxytol               | <i>Feraheme</i> , AMAG Pharmaceuticals Inc, Waltham MA            | 0–0.8mM                            |
| Gd-Dendrimers             | [26]                                                              | 0–0.02mM                           |
| Oxygen                    | N/A                                                               | 0 mmHg,<br>159.6 mmHg,<br>760 mmHg |

**Table E2: Commercially available metallic guidewires and catheters tested for RF-induced heating at 0.55T. Devices with heating < 1°C after 2 minutes of continuous imaging are potentially suitable for in vivo application (final column).**

|                                   |                                                          |                        |   |
|-----------------------------------|----------------------------------------------------------|------------------------|---|
| Nitinol guidewires                | <i>Hi Wire</i> , Cook Medical LLC, Bloomington IN        | 150 cm/0.035"/straight | ✓ |
|                                   |                                                          | 150 cm/0.035"/angled   | ✓ |
|                                   |                                                          | 180 cm/0.035"/straight | ✓ |
|                                   |                                                          | 180 cm/0.035"/angled   | ✓ |
|                                   |                                                          | 260 cm/0.035"/straight | x |
|                                   |                                                          | 260 cm/0.035"/angled   | x |
|                                   | <i>Glidewire</i> , Terumo, Tokyo Japan                   | 150 cm/0.035"/angled   | ✓ |
|                                   |                                                          | 150 cm/0.018"/angled   | ✓ |
|                                   |                                                          | 180 cm/0.035"/angled   | x |
|                                   |                                                          | 180 cm/0.035"/Micro-J  | ✓ |
|                                   |                                                          | 260 cm/0.035"/angled   | x |
|                                   |                                                          | 260 cm/0.018"/angled   | x |
|                                   | <i>Nitrex</i> , Medtronic Covidien EV3, Minneapolis MN   | 145 cm/0.035"/angled   | x |
|                                   |                                                          | 180 cm/0.035"/angled   | x |
| Stainless steel braided catheters | <i>MultipackExpo</i> , Boston Scientific, Marlborough MA | 6F                     | ✓ |
|                                   | <i>SuperTorque</i> , Cordis Co, Milpitas CA              | 6F                     | ✓ |

**Table E3: Imaging parameters used for parametric mapping**

|       | Acquisition               | FOV (mm)  | matrix    | averages | Slice thickness (mm) | TE (ms)                     | TR (ms) | T1 (ms)                                   | Receiver Bandwidth (Hz/Px) | flip angle (°) |
|-------|---------------------------|-----------|-----------|----------|----------------------|-----------------------------|---------|-------------------------------------------|----------------------------|----------------|
| Brain | Gradient echo T1 mapping  | 230 × 230 | 128       | 1        | 10                   | 3.85                        | 10000   | 100, 150, 200, 300, 500, 1000, 5000, 8000 | 300                        | 15             |
|       | TSE T2 mapping            | 208 × 230 | 87 × 128  | 3        | 10                   | 13, 25, 36, 48, 72, 96, 171 | 1000    | N/A                                       | 120                        | 150            |
|       | Gradient echo T2* mapping | 230 × 230 | 123 × 128 | 2        | 10                   | 4.84, 13.32, 21.8, 30.28,   | 790     | N/A                                       | 130                        | 25             |

|                                 |                                                                                          |           |           |   |   |                                                                                                     |       |                                |      |    |
|---------------------------------|------------------------------------------------------------------------------------------|-----------|-----------|---|---|-----------------------------------------------------------------------------------------------------|-------|--------------------------------|------|----|
|                                 |                                                                                          |           |           |   |   | 38.76, 47.24,<br>55.72, 64.2,<br>72.68, 81.16,<br>89.64, 98.12,<br>106.6, 115.08,<br>128.56, 132.04 |       |                                |      |    |
| <b>Cardiac<br/>and<br/>Body</b> | <b>MOLLI T1<br/>mapping<br/>(bSSFP)</b>                                                  | 270 × 360 | 144 × 256 | 1 | 8 | 1.3                                                                                                 | 1036  | Gated 4<br>(3)3 (3)2<br>scheme | 545  | 35 |
|                                 | <b>Cardiac T2-<br/>prepared<br/>bSSFP (prep<br/>lengths = 0 ms,<br/>25s, 40 ms, 60s)</b> | 270 × 360 | 144 × 256 | 1 | 8 | 1.3                                                                                                 | 730   | N/A                            | 545  | 70 |
|                                 | <b>Body T2-<br/>prepared<br/>bSSFP (prep<br/>lengths = 0 ms,<br/>25s, 55s)</b>           | 340 × 255 | 108 × 192 | 1 | 8 | 1.09                                                                                                | 194   | N/A                            | 1184 | 70 |
|                                 | <b>Multi-echo<br/>gradient echo</b>                                                      | 270 × 360 | 144 × 256 | 1 | 8 | 1.8, 4.6, 7.4,<br>10.2, 13.0,<br>15.8, 18.6,<br>21.4                                                | 361.5 | N/A                            | 590  | 15 |
